# Supplementary material for: The pioneer factor SOX9 competes for epigenetic factors to switch stem cell fates
Source: PubMed Central journal article supplement (PMC10415178; doi:10.1038/s41556-023-01184-y), 2023-07-24

Extended Data Fig.5g Full Blot

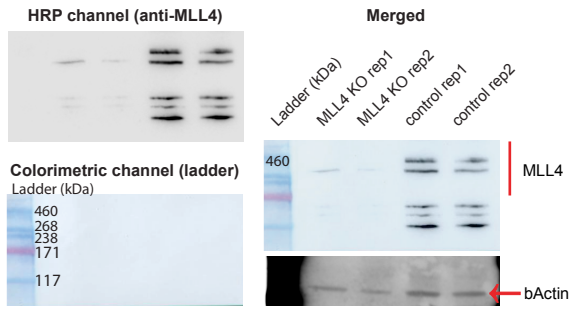

Extended Data Fig.5h Full Blot

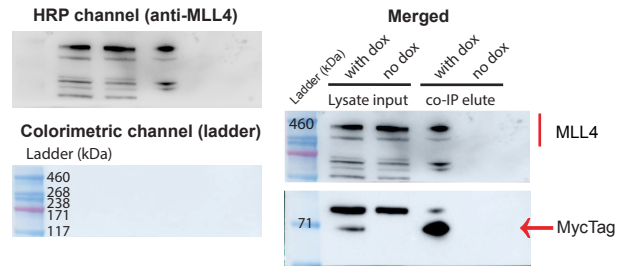

Extended Data Fig.7d Full Blot

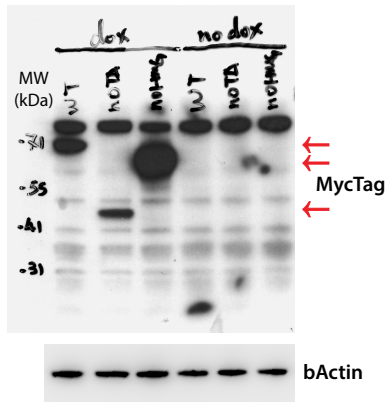

Extended Data Fig.7e Full Blot

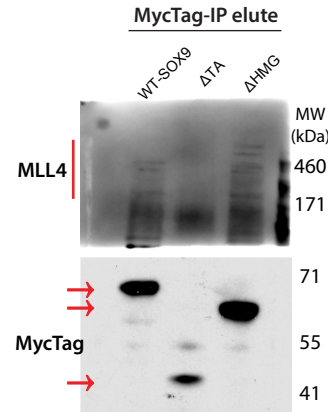

Extended Data Fig.7i Full Blot

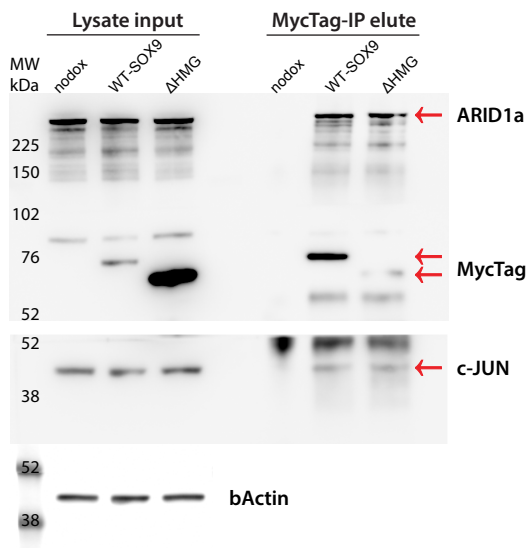

Extended Data Fig.7j Full Blot

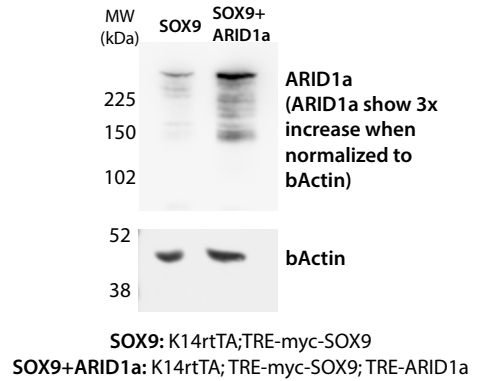

Supplement: 41556_2023_1184_MOESM5_ESM.pdf [file 41556_2023_1184_MOESM5_ESM.pdf]
